# Supplementary material for: Potential Roles for Probiotics in the Treatment of COVID-19 Patients and Prevention of Complications Associated with Increased Antibiotic Use
Source: PubMed Central journal article supplement (PMC8070357; doi:10.3390/antibiotics10040408), 2021-04-09
Supplement: antibiotics-10-00408-s001.pdf [file antibiotics-10-00408-s001.pdf]

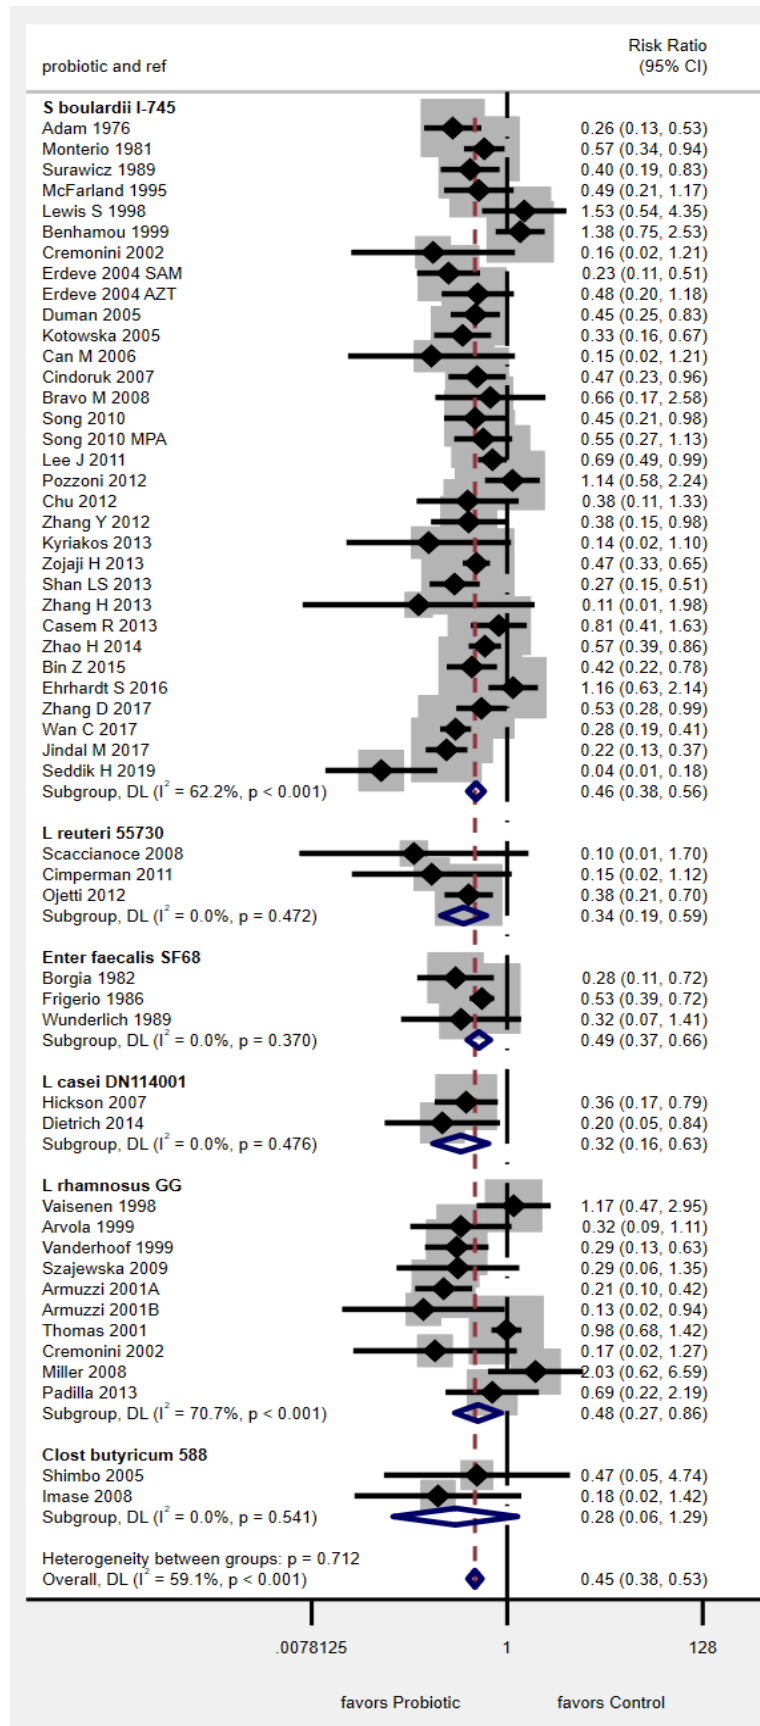

**Figure S1.** Forest plot of single-strain probiotics for the prevention of antibiotic-associated diarrhea (AAD). Abbreviations: CI, Confidence Interval; *L. casei*, *Lactobacillus casei*; *L. reuteri*, *Lactobacillus reuteri*; *L. rhamnosus*, *Lactobacillus rhamnosus*; *Clost. butyricum*, *Clostridium butyricum*; *Enter*.

*faecalis*, *Enterococcus faecalis*; *S. boulardii*, *Saccharomyces boulardii* I-745; RR, Relative Risk. Adapted and updated from: 21, 22, 54-56.

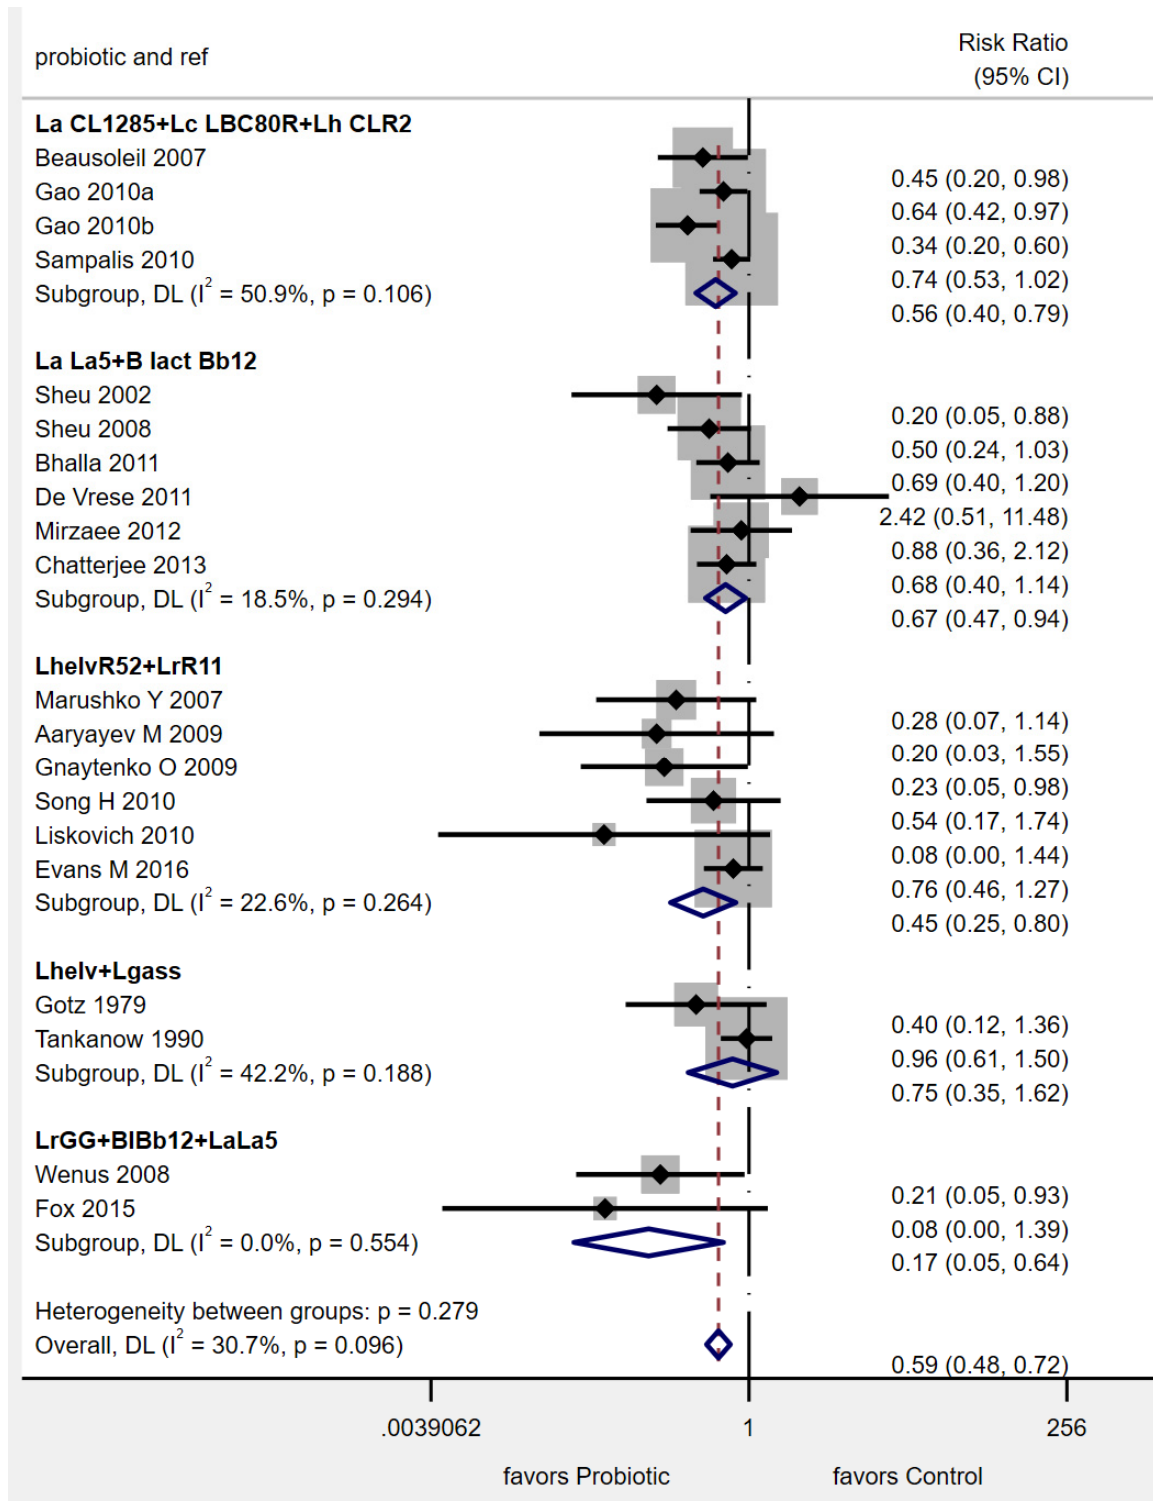

**Figure S2.** Forest plot of multi-strain probiotic mixtures for the prevention of AAD. **Abbreviations:** C.I., Confidence Interval; La CL1285+Lc LBC80R+Lr CLR2, *Lactobacillus acidophilus* CL1285 + *Lacticaseibacillus casei* CL1285 + *Lacticaseibacillus rhamnosus* CLR2, 'Bio-K+'; La La5+B lact Bb12, *Lactobacillus acidophilus* La5 + *Bifidobacterium lactis* Bb12; Lhelv R52+Lr R11, *Lactobacillus helveticus* R52 + *Lacticaseibacillus rhamnosus* R11; L helv+L gass, *Lactobacillus helveticus* + *Lactobacillus gasseri*, 'Lactinex'; LrGG+BIBb12+ LaLa5, *Lacticaseibacillus rhamnosus* GG+ *Bifidobacterium lactis* Bb12+ *Lactobacillus acidophilus* La5; RR, Relative Risk. Adapted and updated from: 21, 22, 54-56.
